# Supplementary material for: Adhesive elastocapillary force on a cantilever beam
Source: Royal Society of Chemistry journal article supplement (doi:10.1039/c9sm00217k), 2019-01-01
Supplement: c9sm00217k2.pdf [file c9sm00217k2.pdf]

Cite this: DOI: 10.1039/xxxxxxxxxx

## Adhesive elastocapillary force on a cantilever beam: Supplementary material

Tristan Gilet,<sup>\*a</sup> Sophie-Marie Gernay,<sup>ab</sup> Lorenzo Aquilante,<sup>b¶</sup> Massimo Mastrangeli,<sup>b‡</sup> and Pierre Lambert<sup>b</sup>

In this supplementary material, the beam model of regimes 2 and 3 is presented in detail, as well as a strategy for solving the corresponding equations numerically. Finally, both the alternative hypothesis of a constant moment  $M_d$  and the adhesion of a dry contact are discussed in the two last sections.

### 1 Main model

The beam deflection is modelled as described in the schematics of Fig. 1. Points D, W and C represent positions of the right end of the beam/substrate apparent contact zone, the beam/liquid/air contact line and the clamp. In regime 2, D coincides with the beam tip while in regime 3, both are separated by a distance  $d$ . The  $s$ -axis is tangent to the beam in D, which corresponds to its origin  $s = 0$ . In regime 2, it makes an angle  $\alpha_d$  with the substrate. The beam deflection  $y(s)$  is measured perpendicularly to this  $s$ -axis. The local beam slope is  $\varphi(s) = \arctan(dy/ds)$ . By definition,  $y(0) = \varphi(0) = 0$ . The clamp is at position  $(s_c, y_c)$  and the beam slope satisfies  $\varphi(s_c) = \alpha_c - \alpha_d$ .

The forces that apply on the beam were described in the main text. They are recalled in the schematics of figure 1. The reaction force in D can be projected in the  $(s, y)$  coordinates:  $N_0 = N_d \cos \alpha_d - T_d \sin \alpha_d$  along  $y$  and  $T_0 = N_d \sin \alpha_d + T_d \cos \alpha_d$  along  $s$ . Therefore,

$$T_0 = N_0 \frac{\tan \alpha_d + \mu}{1 - \mu \tan \alpha_d}. \quad (1)$$

As the beam is a slender body, it always prefers bending instead of stretching, so its deflection  $y(s)$  satisfies the Euler-Bernoulli's equation,  $B\kappa(s) = M(s)$  where  $\kappa(s)$  is the local beam curvature and  $M(s)$  the moment at abscissa  $s$ . In the wet part between D and W,

$$M(s) = M_d + N_0 s - T_0 y - \int_0^s \frac{\sigma W}{R} [(s-s')ds' + (y-y')dy'] \quad (2)$$

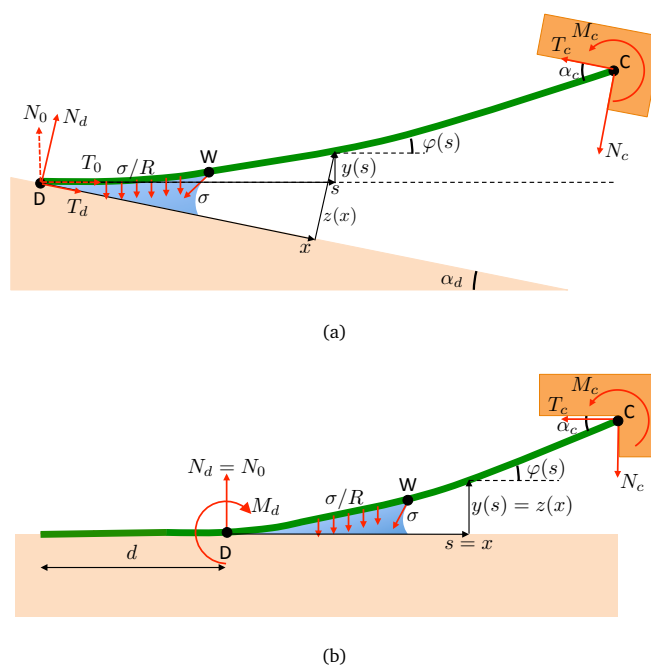

**Fig. 1** Two-dimensional schematics of the beam (green), the clamp (orange), the substrate (apricot) and the capillary bridge (blue). (a) Regime 2, represented with an inclination  $\alpha_d$ , and (b) regime 3. Forces and moments applied to the beam are represented in red. The main variables of the model are indicated.

<sup>a</sup> Microfluidics Lab, Dept. Aerospace and Mech. Eng., University of Liege, 4000 Liege, Belgium. Tel: 32 4366 9166; E-mail: Tristan.Gilet@uliege.be

<sup>b</sup> TIPS, Université Libre de Bruxelles, 1050 Brussels, Belgium.

† Electronic Supplementary Information (ESI) available: [details of any supplementary information available should be included here]. See DOI: 10.1039/cXsm00000x/

‡ Present address: Electronic Components, Technology and Materials, Dept. Micro-electronics, TU Delft, 2628CT Delft, The Netherlands

¶ Present address: Dept. Mech. Eng., Politecnico di Milano, Milan, Italy

while in the dry part between W and C,

$$\begin{aligned} M(s) &= M_d + N_0 s - T_0 y - \int_0^{s_w} \frac{\sigma W}{R} [(s-s')ds' + (y-y')dy'] \\ &- \sigma W (s-s_w) \sin(\theta_b + \varphi_w) \\ &+ \sigma W (y-y_w) \cos(\theta_b + \varphi_w) \end{aligned} \quad (3)$$

where  $s_w$ ,  $y_w$  and  $\varphi_w$  are the position, deflection and inclination at point W.

We consider small beam deflections, i.e.  $y^2 \ll s^2$  and  $\tan \varphi = dy/ds \ll 1$ , so the bending curvature can be approximated by  $d^2y/ds^2$  and the Euler-Bernoulli equation simplifies into:

$$\frac{d^2y}{ds^2} + \frac{T_0}{B} y = \frac{M_d}{B} + \frac{N_0}{B} s - \frac{s^2}{2R\ell^2} \quad (4)$$

for the wet part, and

$$\begin{aligned} \frac{d^2y}{ds^2} &= \left[ \frac{\cos(\theta_b + \varphi_w)}{\ell^2} - \frac{T_0}{B} \right] y + \frac{M_d}{B} + \frac{N_0}{B} s + \frac{s_w^2 - 2ss_w}{2R\ell^2} \\ &- \frac{s-s_w}{\ell^2} \sin(\theta_b + \varphi_w) - \frac{y_w}{\ell^2} \cos(\theta_b + \varphi_w) \end{aligned} \quad (5)$$

for the dry part.

Besides boundary conditions, the beam is subjected to three geometrical constraints. Firstly, as it cannot stretch, its length  $L$  should satisfy

$$L = d + \int_0^{s_c} \sqrt{1 + \left(\frac{dy}{ds}\right)^2} ds \simeq d + s_c + \frac{1}{2} \int_0^{s_c} \tan^2 \varphi ds \quad (6)$$

Secondly, the circular liquid-air interface of the capillary bridge should connect to both the substrate and the beam with contact angles  $\theta_b$  and  $\theta_s$ , respectively. This is satisfied if

$$z_w = s_w \sin \alpha_d + y_w \cos \alpha_d = R [\cos \theta_s + \cos(\theta_b + \alpha_d + \varphi_w)] \quad (7)$$

And thirdly, the volume of liquid per unit width  $V/W = \Omega L^2$ , given by

$$\begin{aligned} \Omega L^2 &\simeq \int_0^{x_w} z dx + \frac{R^2}{2} [\theta_s + \theta_b + \alpha_d + \varphi_w - \pi] \\ &+ \frac{R^2}{2} \sin(\theta_b + \alpha_d + \varphi_w) [2 \cos \theta_s + \cos(\theta_b + \alpha_d + \varphi_w)] \\ &- \frac{R^2}{2} \cos \theta_s \sin \theta_s, \end{aligned} \quad (8)$$

should remain constant, where  $x = s \cos \alpha_d - y \sin \alpha_d$  and

$$\begin{aligned} \int_0^{x_w} z dx &= \frac{s_w^2 - y_w^2}{2} \sin \alpha_d \cos \alpha_d \\ &+ \int_0^{s_w} \left[ y \cos^2 \alpha_d - s \frac{dy}{ds} \sin^2 \alpha_d \right] ds. \end{aligned} \quad (9)$$

The reaction forces and moment at the clamp are given by

$$\begin{aligned} \frac{N_c}{B} &= \frac{N_d}{B} - \frac{x_w}{R\ell^2} - \frac{1}{\ell^2} \sin(\theta_b + \alpha_d + \varphi_w) \\ \frac{T_c}{B} &= \frac{T_d}{B} + \frac{z_w}{R\ell^2} - \frac{1}{\ell^2} \cos(\theta_b + \alpha_d + \varphi_w) \\ \frac{M_c}{B} &= \left. \frac{d^2y}{ds^2} \right]_{s=s_c} \end{aligned} \quad (10)$$

## 1.1 Wet part

### 1.1.1 Regime 2:

In this regime,  $M_d = 0$  and, in the limit of low friction where  $T_0 \ll B/s_w^2$ , the wet part obeys

$$\frac{d^2y}{ds^2} = \frac{N_0}{B} s - \frac{s^2}{2\ell^2 R} \quad (11)$$

The solution to this equation that satisfies  $y = dy/ds = 0$  in  $s = 0$  is

$$\frac{dy}{ds} = \frac{N_0 s^2}{2B} - \frac{s^3}{6\ell^2 R} \quad (12)$$

$$y = \frac{N_0 s^3}{6B} - \frac{s^4}{24\ell^2 R} \quad (13)$$

Since  $dy/ds = \tan \varphi_w$  in  $s = s_w$ , equations 12 and 13 can be rewritten in  $s_w$  as:

$$\frac{s_w^2}{6\ell^2 R} = \frac{N_0 s_w}{2B} - \frac{\tan \varphi_w}{s_w} \quad (14)$$

$$y_w = \frac{N_0 s_w^3}{24B} + \frac{s_w \tan \varphi_w}{4} \quad (15)$$

Combining them with the geometrical condition on the liquid-air interface (eq. 7) yields:

$$\begin{aligned} &\left(\frac{N_0 s_w}{2B}\right)^2 + 2 \left(\frac{\tan \varphi_w}{s_w} + 6 \frac{\tan \alpha_d}{s_w}\right) \frac{N_0 s_w}{2B} \\ &- 3 \frac{\tan \varphi_w}{s_w} \left(\frac{\tan \varphi_w}{s_w} + 4 \frac{\tan \alpha_d}{s_w}\right) \\ &- 2 \frac{\cos \theta_s + \cos(\theta_b + \alpha_d + \varphi_w)}{\ell^2 \cos \alpha_d} = 0 \end{aligned}$$

This quadratic equation can be solved for  $N_0 s_w / (2B)$ . The discriminant  $\rho$  satisfies

$$\rho^2 = \frac{4}{s_w^2} (\tan \varphi_w + 3 \tan \alpha_d)^2 + 2 \frac{\cos \theta_s + \cos(\theta_b + \alpha_d + \varphi_w)}{\ell^2 \cos \alpha_d} \quad (16)$$

Only the solution  $N_0 > 0$  is kept since the beam touches the substrate in regime 2, namely

$$\frac{N_0 s_w}{2B} = \rho - \frac{\tan \varphi_w + 6 \tan \alpha_d}{s_w} \quad (17)$$

Then,

$$\frac{s_w^2}{6\ell^2 R} = \rho - \frac{2 \tan \varphi_w + 6 \tan \alpha_d}{s_w} \quad (18)$$

and

$$y_w = \frac{s_w^2}{12} \left[ \rho + \frac{2 \tan \varphi_w - 6 \tan \alpha_d}{s_w} \right] \quad (19)$$

The liquid volume is evaluated by considering that

$$\int_0^{s_w} y ds = \frac{s_w^3}{60} \left( 2\rho + \frac{\tan \varphi_w - 12 \tan \alpha_d}{s_w} \right)$$

$$\int_0^{s_w} \frac{dy}{ds} s ds = \frac{s_w^3}{20} \left( \rho + \frac{3 \tan \varphi_w - 6 \tan \alpha_d}{s_w} \right) \quad (20)$$

The wet beam length is

$$L_w = s_w + \frac{s_w^7}{504\ell^4 R^2} - \frac{N_0 s_w^6}{72B\ell^2 R} + \frac{N_0^2 s_w^5}{40B^2} \quad (21)$$

### 1.1.2 Regime 3:

In this regime,  $\alpha_d = 0$  which implies  $N_0 = N_d$ , and  $T_0 = 0$ . The wet part obeys

$$\frac{d^2 y}{ds^2} = (s + md) \frac{N_d}{B} - \frac{1}{2R\ell^2} [s^2 + d^2(1 - 2m)] \quad (22)$$

The solution to this equation that satisfies  $y = dy/ds = 0$  in  $s = 0$  is

$$\frac{dy}{ds} = \frac{N_d}{2B} (s^2 + 2mds) - \frac{s^3 + 3d^2(1 - 2m)s}{6\ell^2 R} \quad (23)$$

$$y = \frac{N_d}{6B} (s^3 + 3mds^2) - \frac{s^4 + 6d^2(1 - 2m)s^2}{24\ell^2 R} \quad (24)$$

For the sake of simplifying notations, we define

$$a = \frac{md}{s_w}, \quad b = \frac{(1 - 2m)d^2}{s_w^2} \quad (25)$$

Since  $dy/ds = \tan \varphi_w$  in  $s = s_w$ , equations 23 and 24 can be rewritten in  $s_w$  as:

$$(1 + 3b) \frac{s_w^2}{6\ell^2 R} = (1 + 2a) \frac{N_0 s_w}{2B} - \frac{\tan \varphi_w}{s_w} \quad (26)$$

$$4(1 + 3b) \frac{y_w}{s_w^2} = (1 + 6a - 6b) \frac{N_0 s_w}{6B} + (1 + 6b) \frac{\tan \varphi_w}{s_w} \quad (27)$$

Combining them with the geometrical condition on the liquid-air interface (eq. 7) yields:

$$(1 + 6a - 6b)(1 + 2a) \left( \frac{N_d s_w}{2B} \right)^2 + 2(1 + 12b + 18ab) \frac{\tan \varphi_w}{s_w} \frac{N_d s_w}{2B} - 3 \frac{\tan^2 \varphi_w}{s_w^2} (1 + 6b) - 2(1 + 3b)^2 \frac{\cos \theta_s + \cos(\theta_b + \varphi_w)}{\ell^2} = 0 \quad (28)$$

This quadratic equation can be solved for  $N_d s_w / (2B)$ . The discriminant is then

$$\rho^2 = 4(1 + 3a)^2 (1 + 3b)^2 \frac{\tan^2 \varphi_w}{s_w^2} + 2(1 + 3b)^2 (1 + 2a)(1 + 6a - 6b) \frac{\cos \theta_s + \cos(\theta_b + \varphi_w)}{\ell^2} \quad (29)$$

and only the solution  $N_d > 0$  is kept.

The liquid volume is evaluated by considering

$$\int_0^{s_w} y ds = \frac{N_d s_w^4}{24B} (1 + 4a) - \frac{s_w^5}{120\ell^2 R} (1 + 10b) \quad (30)$$

The wet beam length is

$$L_w = s_w + \frac{s_w^7}{504\ell^4 R^2} - \frac{N_d s_w^6}{72B\ell^2 R} + \left( \frac{N_d^2}{4B^2} - \frac{M_d}{3B\ell^2 R} \right) \frac{s_w^5}{10} + \frac{N_d M_d s_w^4}{8B^2} + \frac{M_d^2 s_w^3}{6B^2} \quad (31)$$

where we recall that

$$\frac{M_d}{B} = \frac{N_d}{B} md - \frac{d^2(1 - 2m)}{2R\ell^2} = a \frac{N_d s_w}{B} - b \frac{s_w^2}{2R\ell^2} \quad (32)$$

### 1.2 Dry part

We define

$$K = \frac{T_0}{B} - \frac{\cos(\theta_b + \varphi_w)}{\ell^2} \quad (33)$$

If  $K > 0$ , then  $k = \sqrt{K}$  and Euler-Bernoulli's differential equation becomes

$$\frac{d^2 y}{ds^2} + k^2 y = Gs + H \quad (34)$$

where

$$G = \frac{N_0}{B} - \frac{s_w}{\ell^2 R} - \frac{\sin(\theta_b + \varphi_w)}{\ell^2}$$

$$H = \frac{M_d}{B} + \frac{s_w^2}{2\ell^2 R} + \frac{s_w \sin(\theta_b + \varphi_w)}{\ell^2} - \frac{y_w \cos(\theta_b + \varphi_w)}{\ell^2} \quad (35)$$

The solution that satisfies boundary conditions at the contact line is:

$$y(s) - y_w - \frac{t}{k} \tan \varphi_w = \frac{C_1}{K} (1 - \cos t) + \frac{C_2}{kK} (t - \sin t)$$

$$\tan \varphi(s) - \tan \varphi_w = \frac{C_1 k}{K} \sin t + \frac{C_2}{K} (1 - \cos t) \quad (36)$$

where  $t = k(s - s_w)$  and

$$C_1 = \frac{M_d}{B} + \frac{N_0}{B} s_w - \frac{T_0}{B} y_w - \frac{s_w^2}{2\ell^2 R}$$

$$C_2 = \frac{N_0}{B} - \frac{T_0}{B} \tan \varphi_w - \frac{s_w}{\ell^2 R} - \frac{\sin \theta_b}{\ell^2 \cos \varphi_w} \quad (37)$$

The dry length  $L_d$  between points W and C is given by

$$\begin{aligned} L_d = & \left(1 + \frac{1}{2} \tan^2 \varphi_w\right) \frac{t_c}{k} + \frac{C_1 C_2}{2K^2} (1 - \cos t_c)^2 \\ & + \frac{C_1^2}{8Kk} (2t_c - \sin 2t_c) + \frac{C_2^2}{8K^2 k} (6t_c - 8 \sin t_c + \sin 2t_c) \\ & + \frac{C_1 \tan \varphi_w}{K} (1 - \cos t_c) + \frac{C_2 \tan \varphi_w}{Kk} (t_c - \sin t_c) \end{aligned} \quad (38)$$

with  $t_c = k(s_c - s_w)$ . The clamp position  $s_c$  is determined through the non-stretching condition  $L = d + L_w + L_d$ . Finally, the clamping condition  $\varphi(s_c) = \alpha_c - \alpha_d$  needs to be imposed.

If  $K < 0$ , then  $k = \sqrt{-K}$  and

$$\frac{d^2 y}{ds^2} - k^2 y = Gs + H \quad (39)$$

The solution that satisfies boundary conditions at the contact line is:

$$\begin{aligned} y(s) - y_w - \frac{t}{k} \tan \varphi_w &= \frac{C_1}{K} (1 - \cosh t) + \frac{C_2}{Kk} (t - \sinh t) \\ \tan \varphi(s) - \tan \varphi_w &= -\frac{C_1 k}{K} \sinh t + \frac{C_2}{K} (1 - \cosh t) \end{aligned} \quad (40)$$

where again  $t = k(s - s_w)$ .

The dry length is then given by

$$\begin{aligned} L_d = & \left(1 + \frac{1}{2} \tan^2 \varphi_w\right) \frac{t_c}{k} + \frac{C_1 C_2}{2K^2} (\cosh t_c - 1)^2 \\ & + \frac{C_1^2}{8Kk} (2t_c - \sinh 2t_c) + \frac{C_2^2}{8K^2 k} (6t_c - 8 \sinh t_c + \sinh 2t_c) \\ & + \frac{C_1 \tan \varphi_w}{K} (1 - \cosh t_c) + \frac{C_2 \tan \varphi_w}{Kk} (t_c - \sinh t_c) \end{aligned} \quad (41)$$

### 1.3 Solving the system of equations

In the previous section, the model of beam deflection has been progressively reduced from a system of differential equations with boundary conditions to a system of non-linear algebraic equations. This latter has been solved iteratively in Matlab according to the following procedure:

1. For a given value of  $\varphi_w$  (here chosen within  $[-5^\circ, 12^\circ]$ ),
  - (a) Consider a range of values for  $s_w$  (here chosen between  $10^{-4}L$  and  $L$ ),
  - (b) Calculate  $\rho(s_w)$ ,  $N_0(s_w)$ ,  $R(s_w)$ ,  $y_w(s_w)$  and  $V(s_w)$  according to section 1.1. In regime 3, both solutions  $\pm\rho$  should be considered, and only the one yielding  $V > 0$  and  $y_w > 0$  is kept.
  - (c) Find  $s_w$  that yields the desired liquid volume  $V$  [the function  $V(s_w)$  is monotonic].
  - (d) Find the clamp position  $s_c$  that yields the desired beam length  $L = d + L_w + L_d$  [the function  $L(s_c)$  is monotonic]. Deduce  $y_c$  and  $\varphi_c$ .
2. Loop on  $\varphi_w$  (i.e., repeat step 1.) until the boundary condition  $\varphi_c = \alpha_c - \alpha_d$  at the clamp is satisfied. A bisection

method was adopted, as there may be several solutions and no guarantee of convergence. Only the less deformed solution (i.e. the solution of smallest  $|\varphi_w|$ ) was kept.

3. Calculate the reaction forces at the clamp  $N_c$ ,  $T_c$  and  $M_c$ .

This process involves one main loop ( $\varphi_w$ ) and two independent secondary loops ( $s_w$  and  $s_c$ ). It is therefore much simpler and less time consuming to solve than the initial model based on the Euler-Bernoulli differential equation with several boundary conditions and geometrical constraints.

## 2 Alternative hypothesis of constant $M_d$

The model of regime 3 is based on the hypothesis of a distributed reaction force through the parameter  $m$ . In the previous models of elastocapillary adhesion, the reaction force was assumed to be localized in D and constant (possibly equal to zero). Following a similar approach to section 1.1 with this new hypothesis on  $M_d$ , we find

$$\begin{aligned} \rho^2 &= \left(\frac{M_d}{B} + 2 \frac{\tan \varphi_w}{s_w}\right)^2 + 2 \frac{\cos \theta_s + \cos(\theta_b + \varphi_w)}{\ell^2} \\ \frac{N_0 s_w}{2B} &= \rho - \frac{2M_d}{B} - \frac{\tan \varphi_w}{s_w} \\ \frac{s_w^2}{6R\ell^2} &= \rho - \frac{M_d}{B} - 2 \frac{\tan \varphi_w}{s_w} \end{aligned} \quad (42)$$

and a deflection

$$y = \frac{M_d}{2B} s^2 + \frac{N_0}{6B} s^3 - \frac{s^4}{24R\ell^2} \quad (43)$$

in the wet zone.

## 3 Dry adhesion in regime 3

In the absence of a liquid bridge, the aforementioned equations are greatly simplified. If we further assume that there is still no friction, the Euler-Bernoulli equation becomes

$$B \frac{d^2 y}{ds^2} = N_d s + M_d. \quad (44)$$

The beam deflection is then

$$y(s) = (-2y_c + \alpha_c s_c) \left(\frac{s}{s_c}\right)^3 + (3y_c - \alpha_c s_c) \left(\frac{s}{s_c}\right)^2, \quad (45)$$

where  $s_c = L - d$ . It satisfies  $y(0) = y'(0) = 0$ ,  $y(s_c) = y_c$  and  $y'(s_c) = \alpha_c$ . The curvature is

$$y'' = \left(-12 \frac{y_c}{s_c^2} + 6 \frac{\alpha_c}{s_c}\right) \frac{s}{s_c} + \left(6 \frac{y_c}{s_c^2} - 2 \frac{\alpha_c}{s_c}\right), \quad (46)$$

from which we infer

$$N_d = \frac{B}{s_c} \left(-12 \frac{y_c}{s_c^2} + 6 \frac{\alpha_c}{s_c}\right) \text{ and } M_d = B \left(6 \frac{y_c}{s_c^2} - 2 \frac{\alpha_c}{s_c}\right). \quad (47)$$

As the beam shall not penetrate the underlying substrate,  $y''(0) \geq 0$ , which yields

$$s_c \leq \frac{3y_c}{\alpha_c}. \quad (48)$$

We may here attempt to determine  $s_c$  (and so  $d$ ) through energy arguments. The internal bending energy of the beam is

$$U = \int_0^{s_c} \frac{B}{2} (y'')^2 dx = \frac{2B}{s_c} \left[ 3 \frac{y_c^2}{s_c^2} - 3 \frac{y_c \alpha_c}{s_c} + \alpha_c^2 \right]. \quad (49)$$

The external work of the loads is

$$W = -\alpha_c M_c + y_c N_c. \quad (50)$$

If the beam is free to slide along the substrate, there is no external force in the  $s$  direction so  $W$  is independent of  $s_c$ . We may consider an additional adhesive energy  $E_a = -\xi(L - s_c)$ .

The total potential energy is therefore

$$\begin{aligned} \Pi(y_c, \alpha_c, s_c) &= U + W + E_a \\ &= \frac{2B}{s_c} \left[ 3 \frac{y_c^2}{s_c^2} - 3 \frac{y_c \alpha_c}{s_c} + \alpha_c^2 \right] - \alpha_c M_c + y_c N_c - \xi(L - s_c). \end{aligned} \quad (51)$$

It should be minimum regarding the three possible displacements

$y_c$ ,  $\alpha_c$  and  $s_c$ :

$$\left. \frac{\partial \Pi}{\partial y_c} \right|_{\alpha_c, s_c} = 0 \Rightarrow \frac{N_c}{B} = -12 \frac{y_c}{s_c^3} + 6 \frac{\alpha_c}{s_c^2} \quad (52)$$

$$\left. \frac{\partial \Pi}{\partial \alpha_c} \right|_{y_c, s_c} = 0 \Rightarrow \frac{M_c}{B} = -6 \frac{y_c}{s_c^2} + 4 \frac{\alpha_c}{s_c} \quad (53)$$

$$\left. \frac{\partial \Pi}{\partial s_c} \right|_{y_c, \alpha_c} = 0 \Rightarrow \sqrt{\frac{\xi}{2B}} s_c^2 + \alpha_c s_c - 3y_c = 0. \quad (54)$$

This latter equation can only be satisfied in the adhesive regime ( $\xi > 0$ ). If the solid-solid interaction is not energetically favourable ( $\xi < 0$ ), then  $\frac{\partial \Pi}{\partial s_c} < 0$  and the minimum is found when  $s_c = 1$ , i.e. when the contact area between the beam and the substrate is reduced to 0.

For  $\xi > 0$ , an equilibrium in  $s_c < 1$  satisfying equation (54) is necessarily stable since

$$\frac{\partial^2 \Pi}{\partial s_c^2} = \frac{6B}{s_c^5} \left[ (3y_c - \alpha_c s_c)^2 + 3y_c^2 \right] > 0. \quad (55)$$

The solution  $s_c$  to Eq. (54) is in the range  $]0, L[$  when

$$y_c < \frac{\alpha_c L}{3} + \frac{L^2}{3} \sqrt{\frac{\xi}{2B}}. \quad (56)$$

We note that  $M_d = \sqrt{2\xi B}$  is constant.
